# Supplementary material for: Assessment of factors affecting flicker ERGs recorded with RETeval from data obtained from health checkup screening
Source: PubMed Central journal article supplement (PMC10124871; doi:10.1371/journal.pone.0284686), 2023-04-24
Supplement: pone.0284686.s001.pdf [file pone.0284686.s001.pdf]

**S1 Table. Reasons of known ocular diseases or abnormal findings for the exclusion**

|                                  | Right eyes | Left eyes |
|----------------------------------|------------|-----------|
| glaucoma or glaucoma suspect     | 46         | 55        |
| drusen                           | 20         | 17        |
| epiretinal membrane              | 11         | 10        |
| age-related macular degeneration | 11         | 8         |
| unreadable fundus color          | 6          | 12        |
| fundus hemorrhage                | 4          | 6         |
| myopic conus                     | 3          | 6         |
| retinal edema                    | 3          | 2         |
| retinal degeneration             | 2          | 4         |
| diabetic retinopathy             | 2          | 2         |
| retinoschisis                    | 2          | 2         |
| after retinal photocoagulation   | 2          | 1         |
| macular hole                     | 1          | 0         |
| vitreomacular traction syndrome  | 1          | 0         |

The left panel shows the reasons of known ocular diseases or abnormal findings for the exclusion, middle panel shows the number of the reasons of the left panel in the right eyes, and the right panel shows the number of the reasons of the left panel in the left eyes.
