# Supplementary material for: Assessment of factors affecting flicker ERGs recorded with RETeval from data obtained from health checkup screening
Source: PubMed Central journal article supplement (PMC10124871; doi:10.1371/journal.pone.0284686), 2023-04-24
Supplement: pone.0284686.s002.pdf [file pone.0284686.s002.pdf]

**S2 Table. The data items studied of health checkup**

|                                   |                              |                                         |
|-----------------------------------|------------------------------|-----------------------------------------|
| BCVA                              | logMAR                       | -                                       |
| IOP                               | mmHg                         | -                                       |
| Axial length                      | mm                           | -                                       |
| Radius of the pupillary diameter  | mm                           | -                                       |
| Amplitude of the flicker ERGs     | $\mu$ V                      | -                                       |
| Implicit time of the flicker ERGs | msec                         | -                                       |
| Sex                               | Male / Female                | -                                       |
| Age                               | years                        | -                                       |
| Height                            | cm                           | -                                       |
| Mass                              | kg                           | -                                       |
| Systolic blood pressure           | mmHg                         | -                                       |
| Diastolic blood pressure          | mmHg                         | -                                       |
| Brinkman index                    | cigarettes $\cdot$ years/day | -                                       |
| IMT                               | mm                           | $\leq 1.0$                              |
| WBC                               | $10^3$ /mL                   | 3.3 – 8.6                               |
| RBC                               | $10^4$ /mL                   | Male: 435 – 555 / Female: 386 – 492     |
| Hb                                | g/dL                         | Male: 13.7 – 16.8 / Female: 11.6 – 14.8 |
| Ht                                | %                            | Male: 40.7 – 50.1 / Female: 35.1 – 44.4 |
| MCV                               | fL                           | 83.6 – 98.2                             |
| Plt                               | $10^4$ /mL                   | 15.8 – 34.8                             |
| HbA1c                             | %                            | 4.9 – 6.0                               |
| BS                                | mg/dL                        | 73 – 109                                |
| Protein                           | g/dL                         | 6.6 – 8.1                               |
| Alb                               | g/dL                         | 4.1– 5.1                                |
| ALP                               | U/L                          | 106 – 322                               |
| GOT                               | U/L                          | 13 – 30                                 |
| GPT                               | U/L                          | Male: 10 – 42 / Female: 7 – 23          |
| $\gamma$ GTP                      | U/L                          | Male: 13 – 64 / Female: 9 – 32          |
| Total cholesterol                 | mg/dL                        | 142 – 248                               |
| TG                                | mg/dL                        | Male: 40 – 234 / Female: 30 – 117       |
| HDL                               | mg/dL                        | Male: 38 – 90                           |
| LDL                               | mg/dL                        | 65 – 163                                |
| BUN                               | mg/dL                        | 8 – 20                                  |
| Cre                               | mg/dL                        | Male: 0.65 – 1.07 / Female: 0.46 – 0.79 |
| Uric acid                         | mg/dL                        | Male: 3.7 – 7.8 / Female: 2.6 – 5.5     |
| Ca                                | mg/dL                        | 8.8 – 10.1                              |
| CRP                               | mg/L                         | 0.00 – 0.14                             |

The left panel shows the data item studied of health checkup, middle panel shows units or classifications of the items, and the right panel shows the reference intervals published by Japanese Society of Laboratory Medicine (JSLM, 2018).

BCVA, best-corrected visual acuity; IOP, Intraocular pressure; IMT, Intima Media Thickness; WBC, white blood cell; RBC, red blood cell; Hb, hemoglobin; Ht, hematocrit; MCV, mean corpuscular volume; Plt, Platelet; HbA1c, Hemoglobin A1c; BS, blood sugar; Alb, albumin; ALP, alkaline phosphatase; GOT, glutamic oxaloacetic transaminase; GPT, glutamic pyruvic transaminase;  $\gamma$ GTP,  $\gamma$ -glutamyl transpeptidase; TG, triglyceride; HDL, high density lipoprotein cholesterol; LDL, low density lipoprotein cholesterol; BUN, Blood urea nitrogen; Cre, Creatinine; Ca, calcium; CRP, C-reactive protein.
