# Supplementary material for: Assessment of factors affecting flicker ERGs recorded with RETeval from data obtained from health checkup screening
Source: PubMed Central journal article supplement (PMC10124871; doi:10.1371/journal.pone.0284686), 2023-04-24
Supplement: pone.0284686.s003.pdf [file pone.0284686.s003.pdf]

**S3 Table. Results of hematologic tests**

|                           |                           |
|---------------------------|---------------------------|
| WBC (10 <sup>3</sup> /μL) | 5.91 ± 1.49 [2.9-13.2]    |
| RBC (10 <sup>4</sup> /μL) | 447 ± 40 [310-586]        |
| Hb (g/dL)                 | 13.5 ± 1.2 [7.8-17.7]     |
| Ht (%)                    | 41.3 ± 3.7 [26.2-53.1]    |
| MCV (fL)                  | 92.5 ± 4.9 [64.3-111]     |
| Plt (10 <sup>4</sup> /μL) | 21.9 ± 4.9 [9.3-41.7]     |
| HbA1c (%)                 | 5.7 ± 0.51 [4.0-8.9]      |
| BS (mg/dL)                | 88 ± 14 [60-160]          |
| Protein (g/dL)            | 7.3 ± 0.39 [6.3-8.5]      |
| Alb (g/dL)                | 4.3 ± 0.24 [3.5-5.0]      |
| ALP (U/L)                 | 214 ± 63 [78-543]         |
| GOT (U/L)                 | 23.3 ± 8.2 [12-87]        |
| GPT (U/L)                 | 23.6 ± 15.5 [7-162]       |
| γGTP (U/L)                | 35.8 ± 50.4 [7-474]       |
| Total cholesterol (mg/dL) | 214 ± 35 [115-363]        |
| TG (mg/dL)                | 105 ± 61 [30-475]         |
| HDL (mg/dL)               | 59.5 ± 14.5 [32-125]      |
| LDL (mg/dL)               | 126 ± 31.0 [50-263]       |
| BUN (mg/dL)               | 14.7 ± 3.8 [5.4-29.2]     |
| Cre (mg/dL)               | 0.75 ± 0.17 [0.43-1.55]   |
| Uric acid (mg/dL)         | 5.38 ± 1.33 [2.2-9.7]     |
| Ca (mg/dL)                | 9.38 ± 0.28 [8.6-10.1]    |
| CRP (mg/dL)               | 0.09 ± 0.22 [0.002-2.626] |

WBC, white blood cell; RBC, red blood cell; Hb, hemoglobin; Ht, hematocrit; MCV, mean corpuscular volume; Plt, Platelet; HbA1c, Hemoglobin A1c; BS, Blood sugar; Alb, albumin; ALP, alkaline phosphatase; GOT, glutamic oxaloacetic transaminase; GPT, glutamic pyruvic transaminase; γGTP, γ- glutamyl transpeptidase; Total Chol, Total cholesterol; TG, triglyceride; HDL, high density lipoprotein cholesterol; LDL, low density lipoprotein cholesterol; BUN, Blood urea nitrogen; Cre, Creatinine; Ca, calcium; CRP, C-reactive protein.

Data are mean ± standard deviation [range].
